# Supplementary material for: Increasing Reaction Rates of Water-Soluble Porphyrins for 64Cu Radiopharmaceutical Labeling
Source: MDPI journal article supplement (doi:10.3390/molecules28052350), 2023-03-03
Supplement: s1 [file s1]

# Increasing of reaction rates of water soluble porphyrins for $^{64}\text{Cu}$ radiopharmaceutical labelling

Mateusz Pęgier <sup>1,\*</sup>, Krzysztof Kilian <sup>1</sup> and Krystyna Pyrzynska <sup>2</sup>

<sup>1</sup> Heavy Ion Laboratory, University of Warsaw, Pasteura 5A, 02-093 Warsaw, Poland

<sup>2</sup> Faculty of Chemistry, University of Warsaw, Pasteura 1, 02-093 Warsaw, Poland

\* Correspondence: pegier@slcj.uw.edu.pl

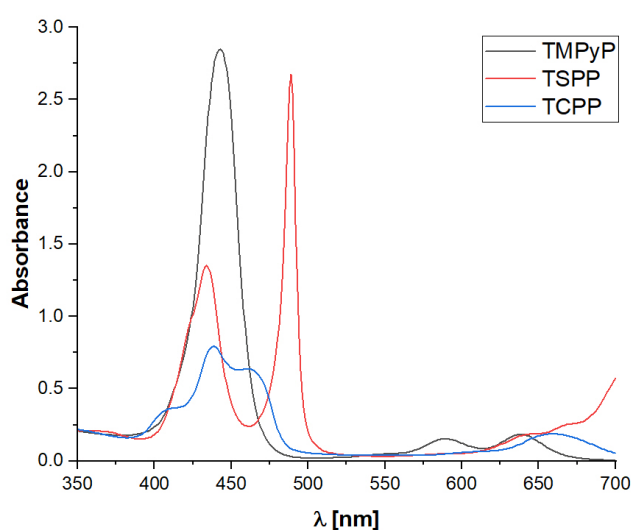

Figure S1. Spectra of protonated porphyrins.  $[\text{TMPyP}] = [\text{TSPP}] = [\text{TCPP}] = 10^{-5} \text{ mol L}^{-1}$ ; pH 1.5.

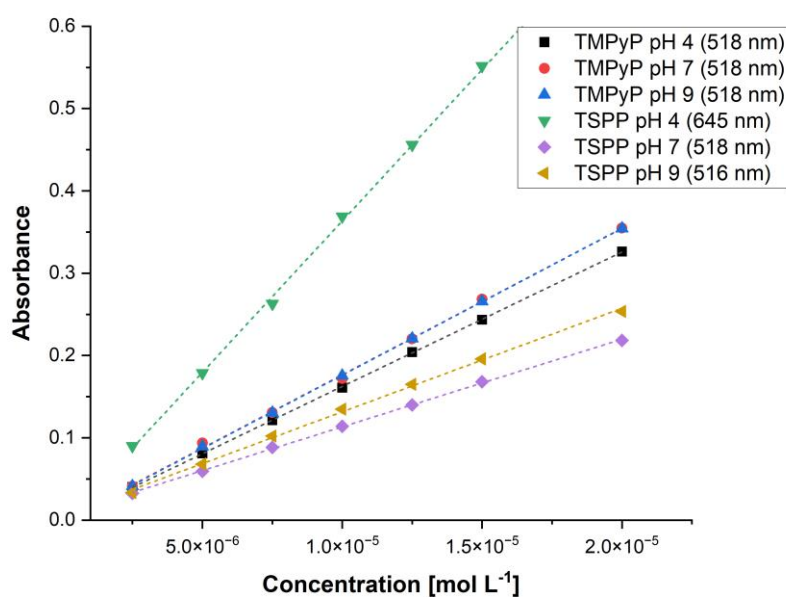

Figure S2. Study of aggregation of porphyrins at different pH and concentrations. Wavelength of peak maximum is given in parentheses.

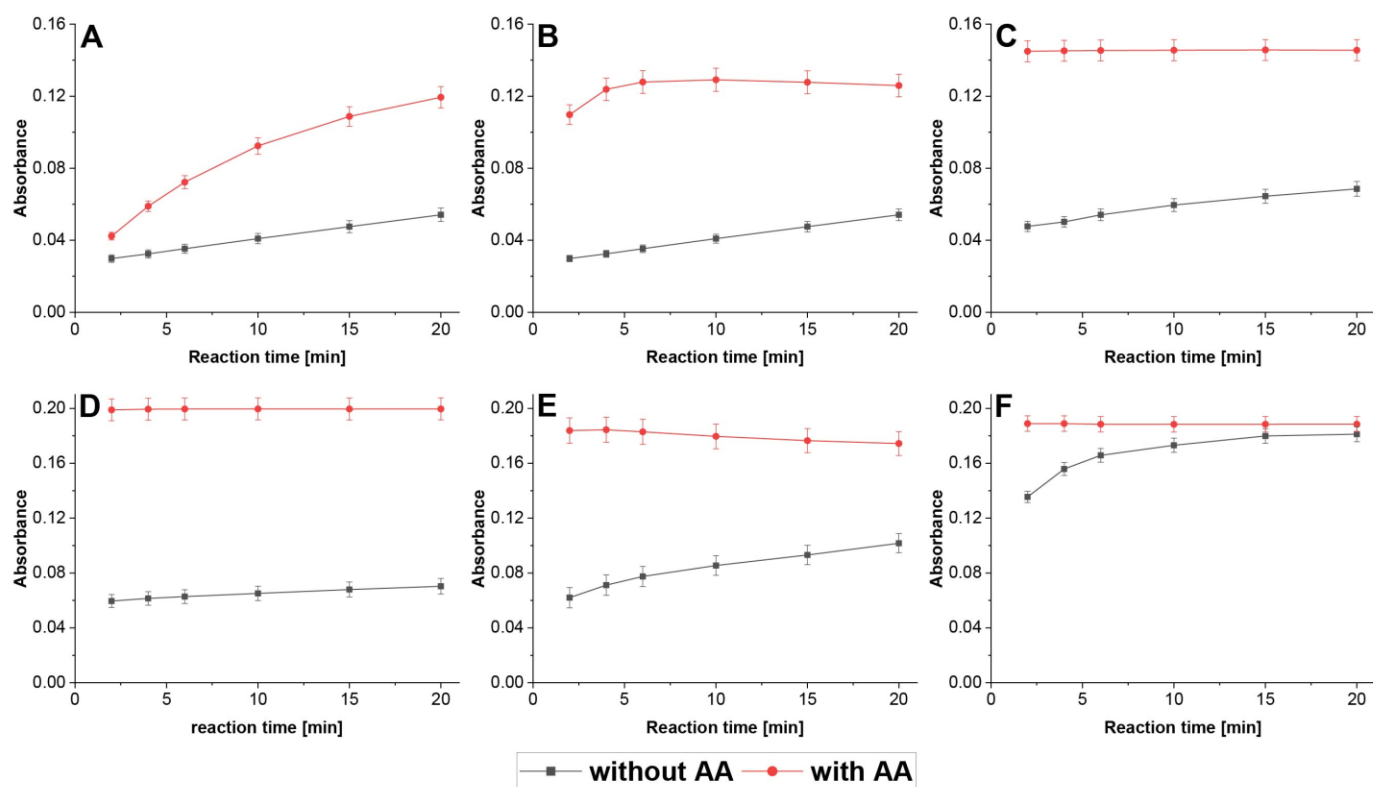

**Figure S3.** Complexation of Cu with porphyrins with and without the addition of AA (pH and [AA]:[Cu] ratio in brackets): (A) TSPP (pH 4, 50:1); (B) TSPP (pH 7, 50:1); (C) TSPP (pH 9, 10:1); (D) TMPyP (pH 4, 10:1); E – TMPyP (pH 7, 20:1); F – TMPyP (pH 9, 10:1).  $[Cu^{2+}] = [TSPP] = [TMPyP] = 10^{-5} \text{ mol L}^{-1}$ .

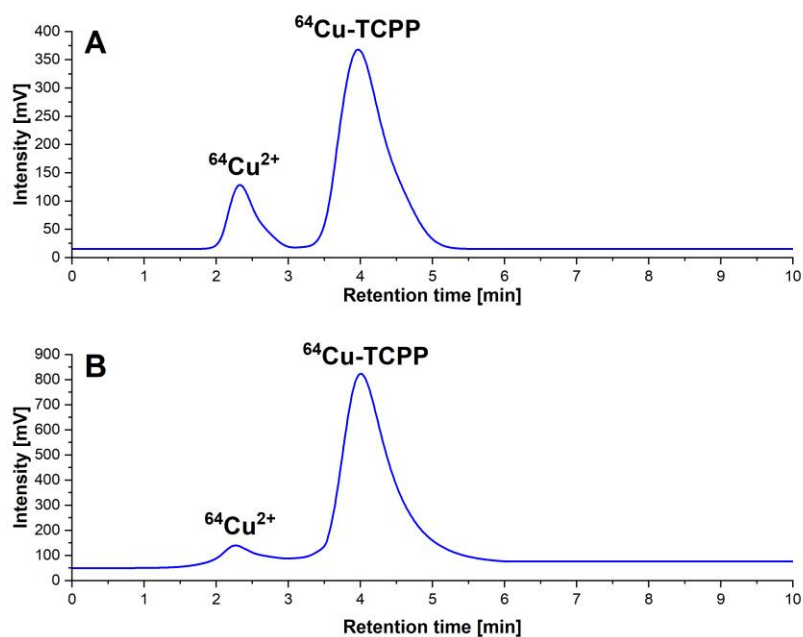

**Figure S4.** Radio-chromatogram of raw product (A) and purified final product (B). Separation: Phenomenex Gemini C18 column (150 mm  $\times$  4.0 mm i.d., 10  $\mu\text{m}$ ), mobile phase: 40:60 acetonitrile:0.05 mol  $\text{L}^{-1}$   $\text{CH}_3\text{COOH}/\text{CH}_3\text{COONa}$  pH 4.8, 1 mL  $\text{min}^{-1}$  flow rate.

**A**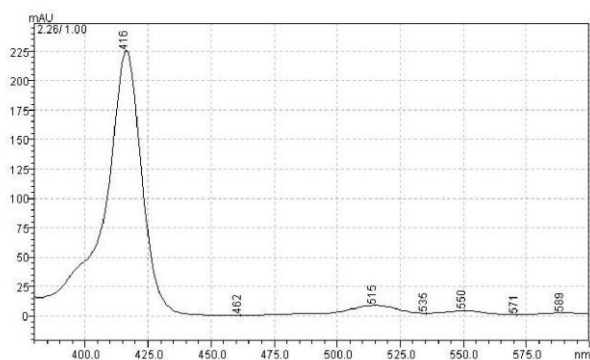**B**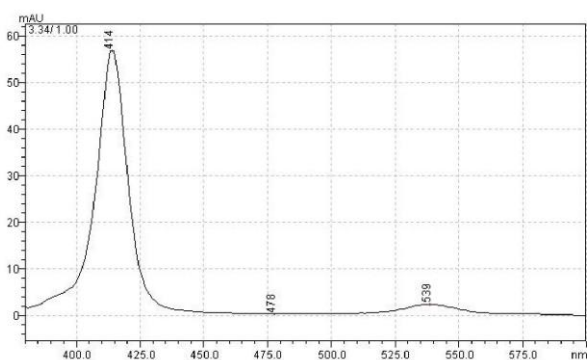

**Figure S5.** Spectra of **(A)** TCPP and **(B)** Cu-TCPP recorded at retention times: 2.2 and 3.3 min respectively. Separation: Phenomenex Gemini C18 column (150 mm  $\times$  4.0 mm i.d., 10  $\mu$ m), mobile phase: 40:60 acetonitrile: 0.05 mol L<sup>-1</sup> CH<sub>3</sub>COOH/CH<sub>3</sub>COONa pH 4.8, 1 mL min<sup>-1</sup> flow rate.
